# Supplementary material for: Silica direct evaporation: a size-controlled approach to SiC/carbon nanosheet composites as Pt catalyst supports for superior methanol electrooxidation
Source: Royal Society of Chemistry journal article supplement (doi:10.1039/c5ta07811c), 2015-01-01
Supplement: c5ta07811c1.pdf [file c5ta07811c1.pdf]

**Silica direct evaporation: A size-controlled approach to SiC/carbon nanosheet  
composites as Pt catalyst support for superior methanol electrooxidation**

Lei Wang,<sup>a</sup> Lu Zhao,<sup>a</sup> Peng Yu,<sup>a</sup> Chungui Tian,<sup>a</sup> Fanfei Sun,<sup>b</sup> He Feng,<sup>a</sup> Wei Zhou,<sup>a</sup>  
Jianqiang Wang,<sup>b</sup> Honggang Fu<sup>a,\*</sup>

<sup>a</sup> *Key Laboratory of Functional Inorganic Material Chemistry, Ministry of Education  
of the People's Republic of China, Heilongjiang University, Harbin 150080 (P. R.  
China); Fax: (+86) 451-8666-1259; E-mail: fuhg@vip.sina.com*

<sup>b</sup> *Shanghai Synchrotron Radiation Facility (SSRF), Shanghai Institute of Applied  
Physics, Chinese Academy of Sciences, Shanghai, 201204, P. R. China*

**Table S1.** The synthetic conditions for all the compared samples.

| Samples                                | Synthetic conditions                            | Heating temperature<br>(°C) |
|----------------------------------------|-------------------------------------------------|-----------------------------|
| SiC/GC<br>(also called as SiC/GC-1400) | ceramic chip                                    | 1400                        |
| SiC/GC-1300                            | ceramic chip                                    | 1300                        |
| SiC/GC-1500                            | ceramic chip                                    | 1500                        |
| GC                                     | without ceramic chip                            | 1400                        |
| SiC/C                                  | The CS without treating<br>by FeCl <sub>3</sub> | 1400                        |

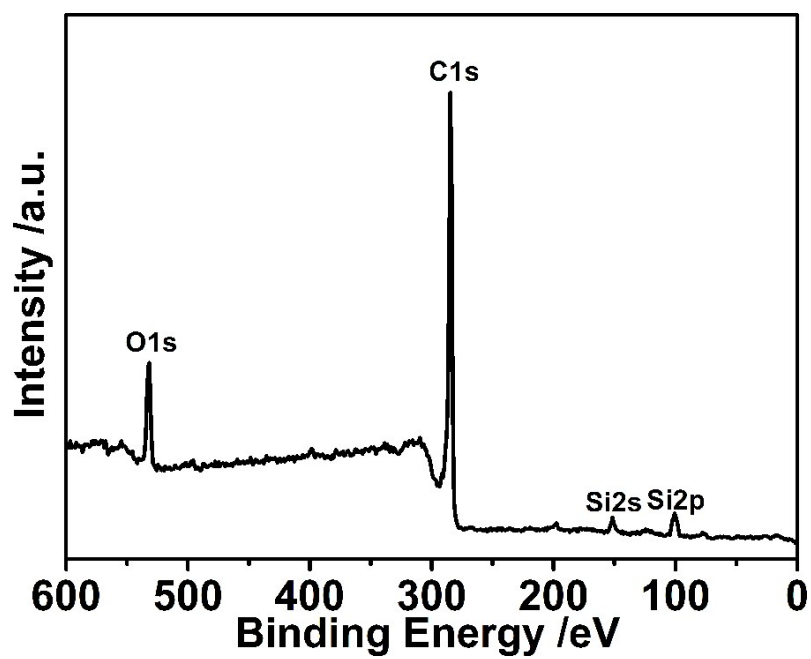

Fig. S1 Wide XPS spectrum of SiC/GC composite.

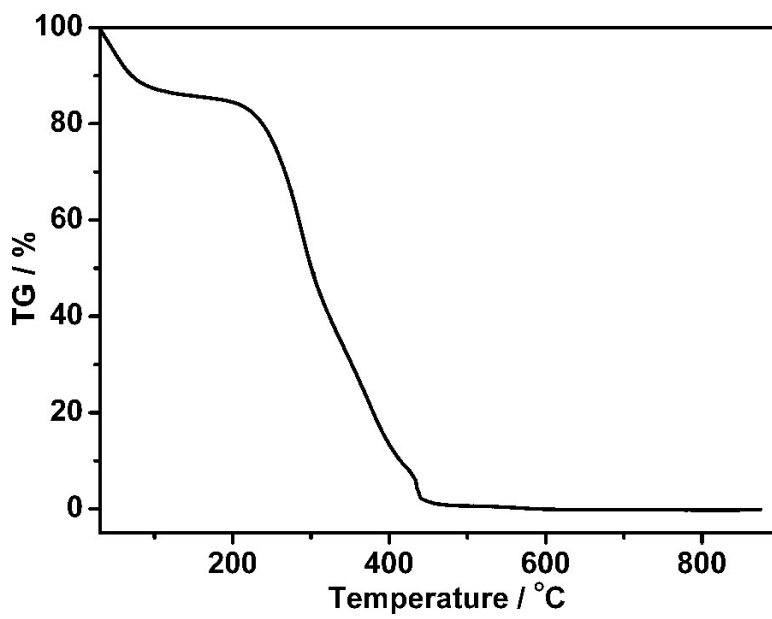

Fig. S2 TG analysis of CS raw material under air.

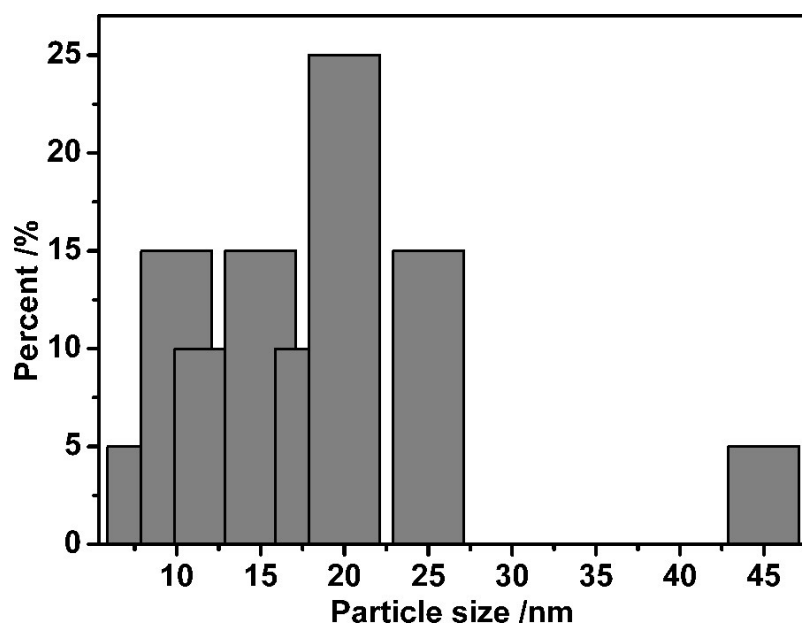

**Fig. S3** The corresponding Pt NPs size-distributed graph calculated from Fig. 2A.

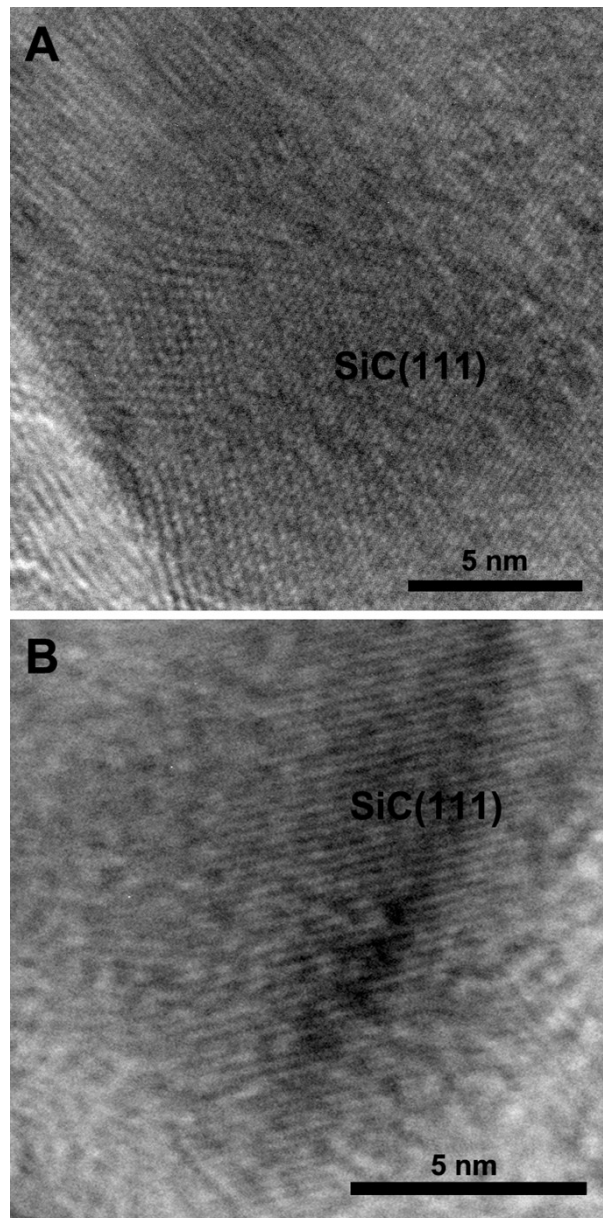

**Fig. S4** A, B are the corresponding HRTEM images of Fig. 2C and Fig. 2D, respectively.

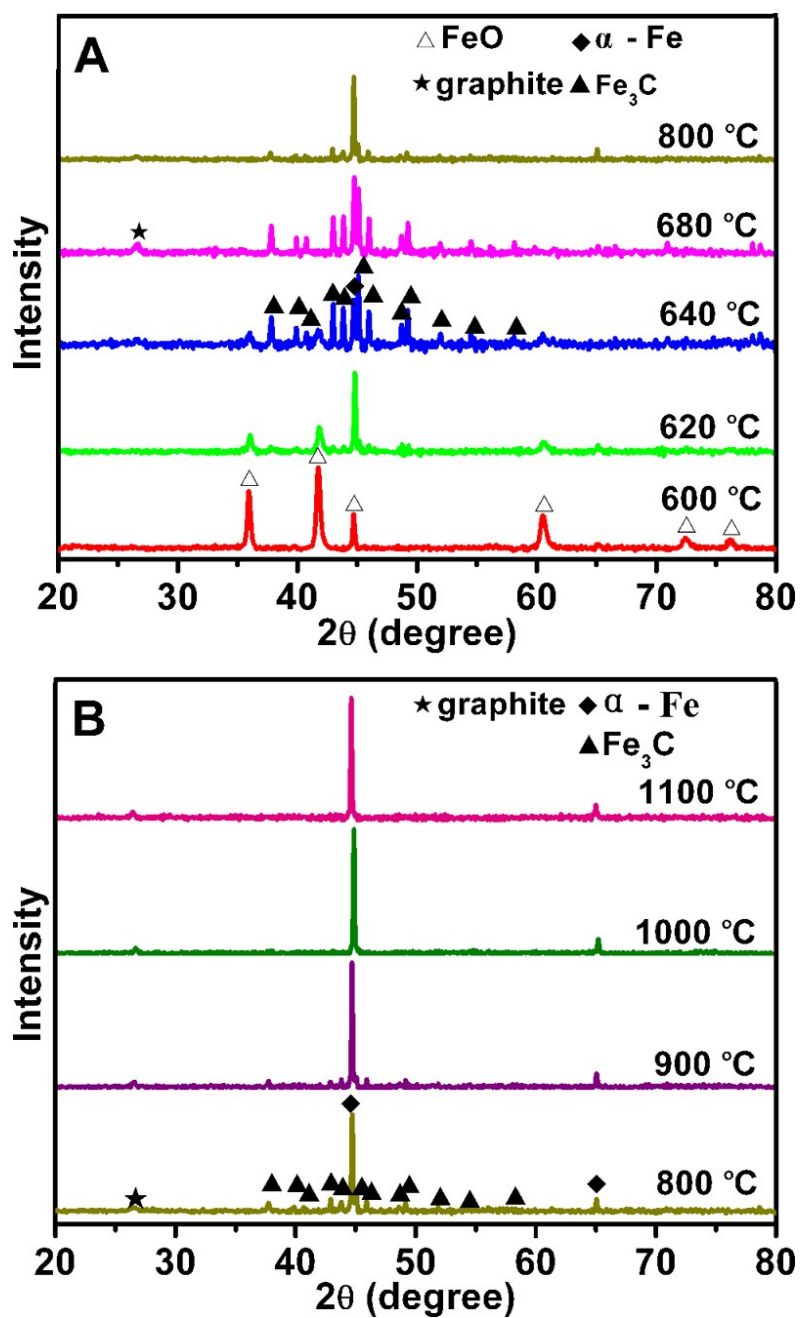

Fig. S5 XRD patterns of the composites derived from CS-Fe<sup>3+</sup> precursor with the heating temperature of 600~1100 °C.

**Table S2.** Fitting parameters of the Fe EXAFS spectra based on Fig. 3.

| Heating temperature | Shell  | N [a]          | R (Å) [b]       |
|---------------------|--------|----------------|-----------------|
| 600°C               | Fe-O   | $2.8 \pm 0.5$  | $2.06 \pm 0.02$ |
|                     | Fe-Fe  | $11.0 \pm 1.1$ | $3.06 \pm 0.01$ |
|                     | Fe-Fe  | $8.3 \pm 1.1$  | $4.33 \pm 0.03$ |
| 620°C               | Fe-C/O | $2.2 \pm 0.2$  | $2.08 \pm 0.02$ |
|                     | Fe-Fe  | $2.1 \pm 0.4$  | $2.52 \pm 0.01$ |
|                     | Fe-Fe  | $5.2 \pm 0.6$  | $3.12 \pm 0.05$ |
| 680°C               | Fe-C   | $0.4 \pm 0.1$  | $1.87 \pm 0.02$ |
|                     | Fe-Fe  | $7.2 \pm 0.4$  | $2.51 \pm 0.01$ |
|                     | Fe-Fe  | $9.3 \pm 1.7$  | $4.07 \pm 0.01$ |
| 800°C               | Fe-Fe  | $3.1 \pm 0.4$  | $2.43 \pm 0.01$ |
|                     | Fe-Fe  | $2.5 \pm 0.3$  | $2.81 \pm 0.01$ |
|                     | Fe-Fe  | $6.3 \pm 0.4$  | $4.06 \pm 0.01$ |

[a] Coordination number. [b] Distance between absorber and backscatterer atoms.



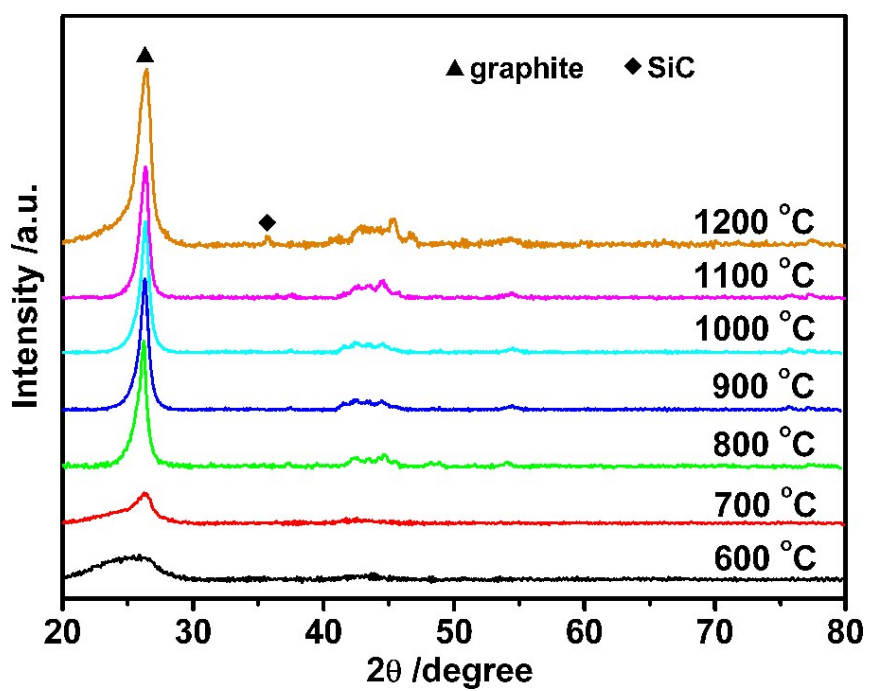

**Fig. S6** XRD patterns of the samples derived from CS-Fe<sup>3+</sup> precursor with the heating temperature of 600~1200 °C after treating with 10 % HCl.

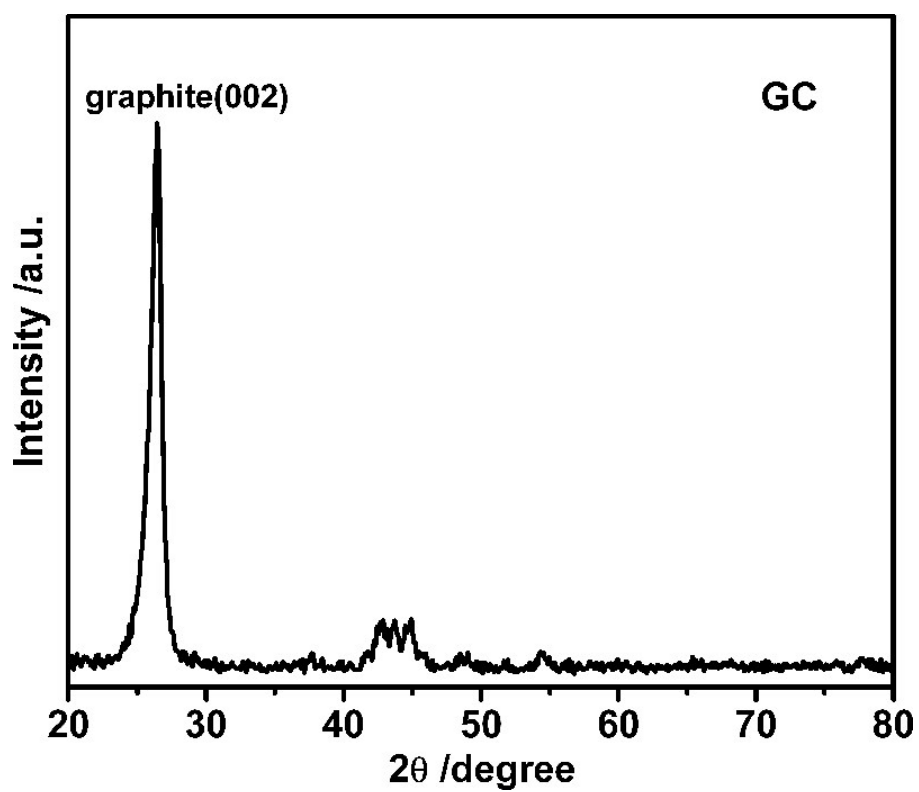

**Fig. S7** XRD pattern of GC synthesized from coconut-Fe<sup>3+</sup> precursor without ceramic chip at a heating temperature of 1400 °C.

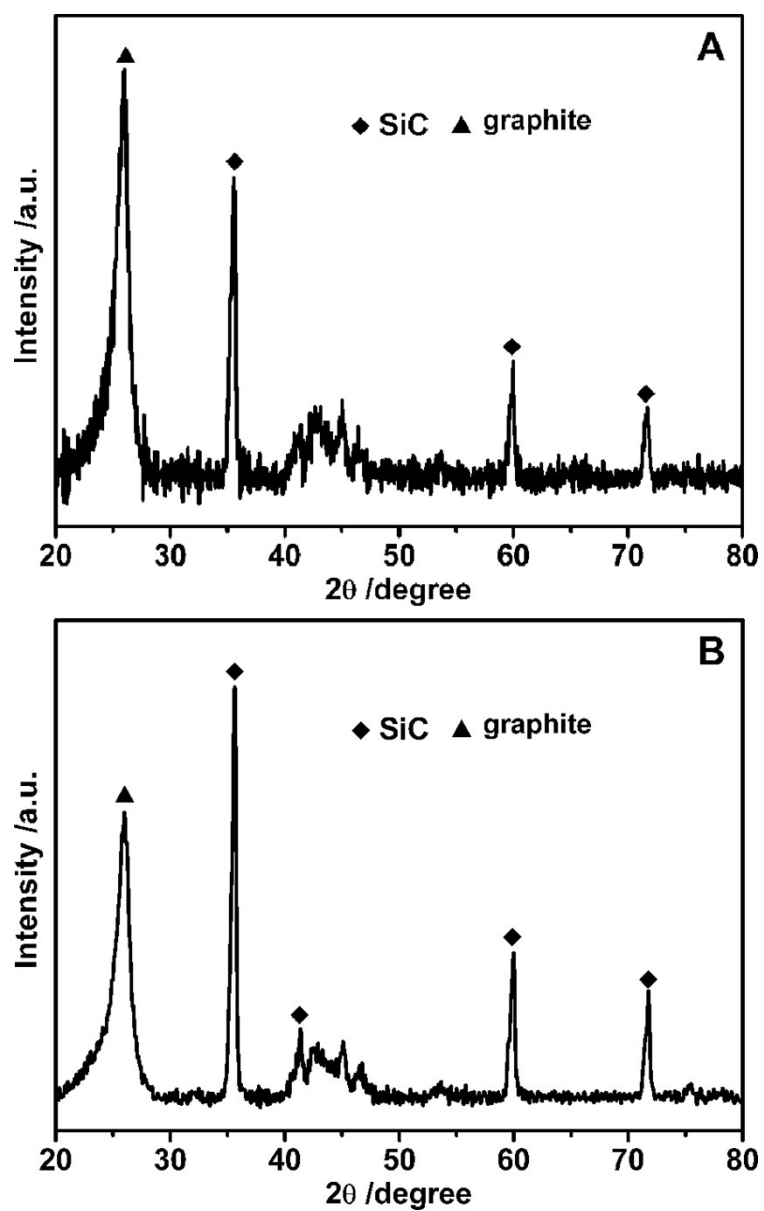

**Fig. S8** XRD patterns of (A) SiC/GC-1300 and (B) SiC/GC-1500, respectively.

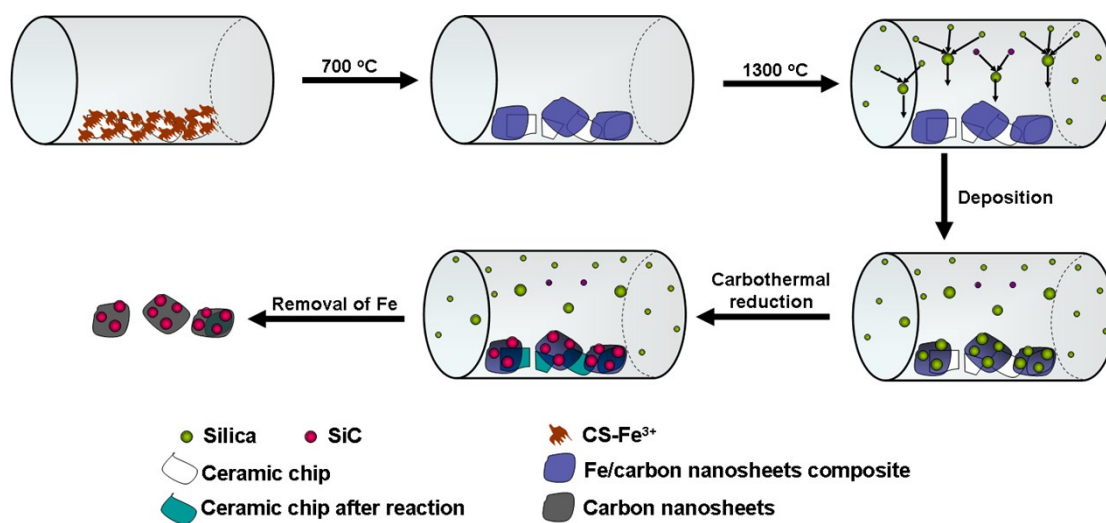

**Scheme S1.** The supposed formation process of SiC/GC composites synthesized from 1300 °C.

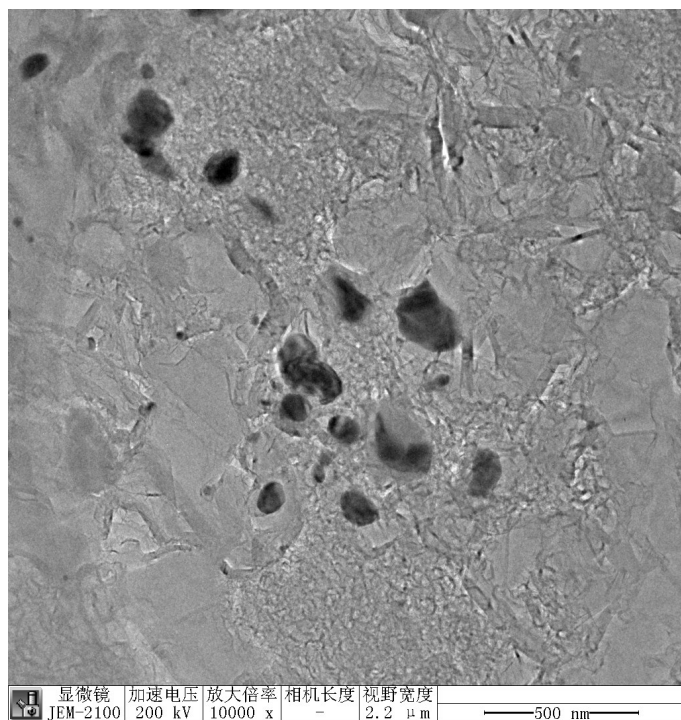

**Fig. S9** TEM images of SiC/GC-1300.

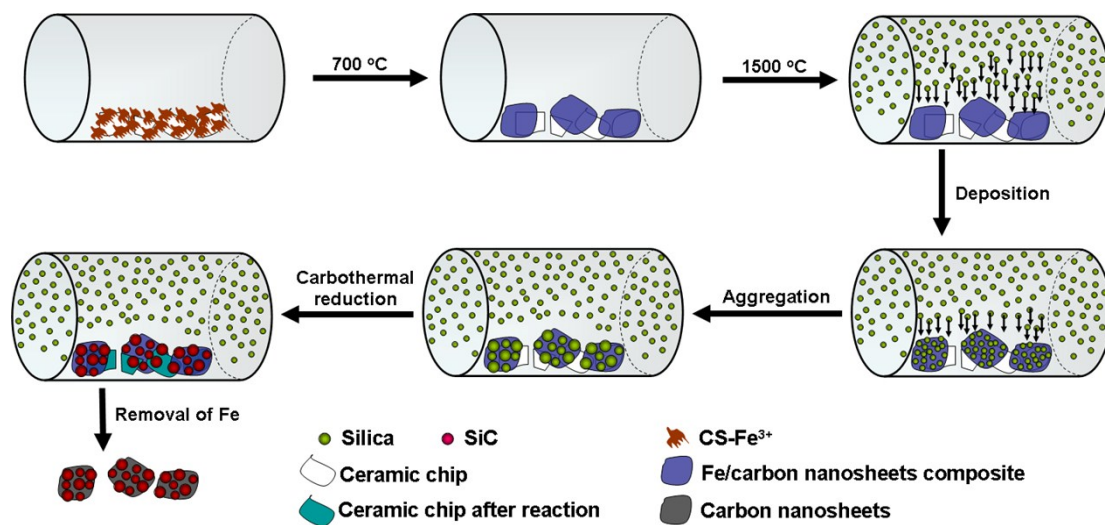

**Scheme S2.** The supposed formation process of SiC/GC composites synthesized from 1500 °C.

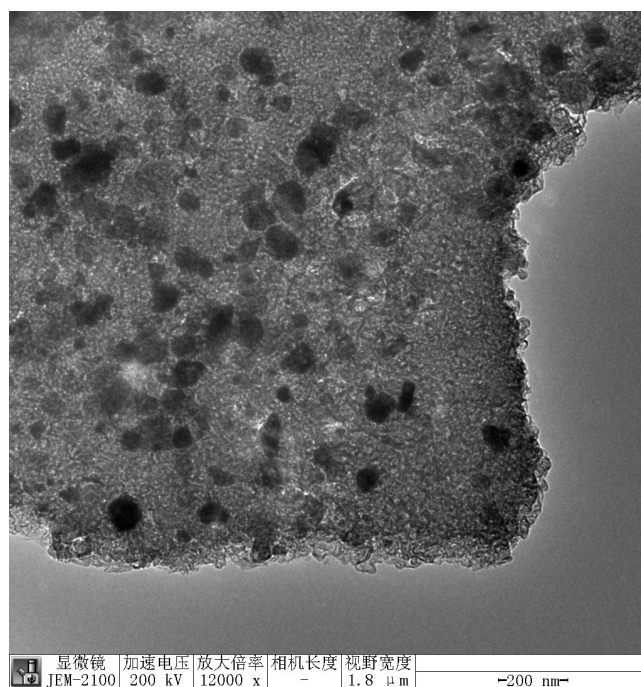

**Fig. S10** TEM images of SiC/GC-1500.

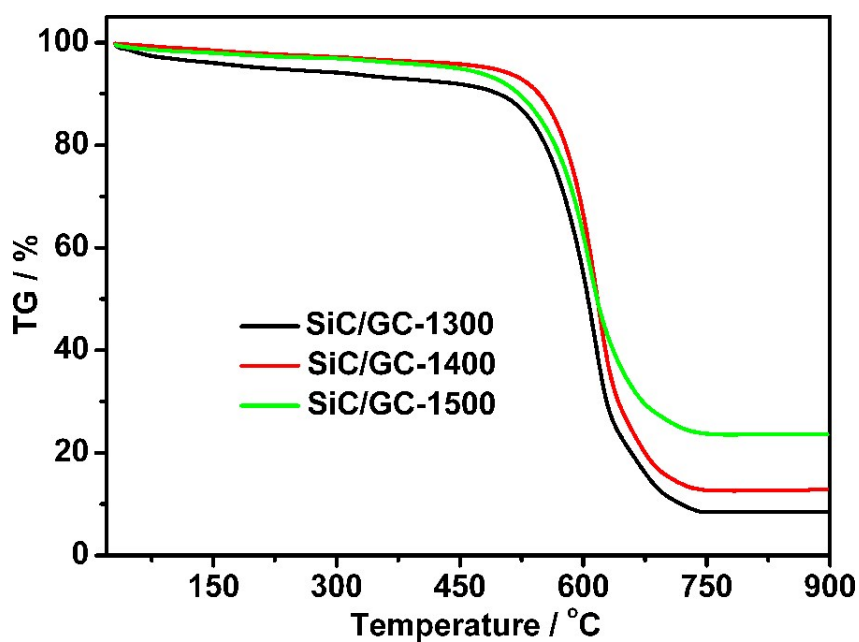

**Fig. S11** TG curves of the SiC/GC samples under air synthesized from different temperatures. Notably, SiC/GC-1400 is also called as SiC/GC in this work.

**Table S3.** SiC content of the SiC/GC samples based on Fig. S11.

| Samples                 | SiC content calculated from TG curves (%) |
|-------------------------|-------------------------------------------|
| SiC/GC-1300             | 5.6                                       |
| SiC/GC-1400<br>(SiC/GC) | 8.4                                       |
| SiC/GC-1500             | 16.1                                      |



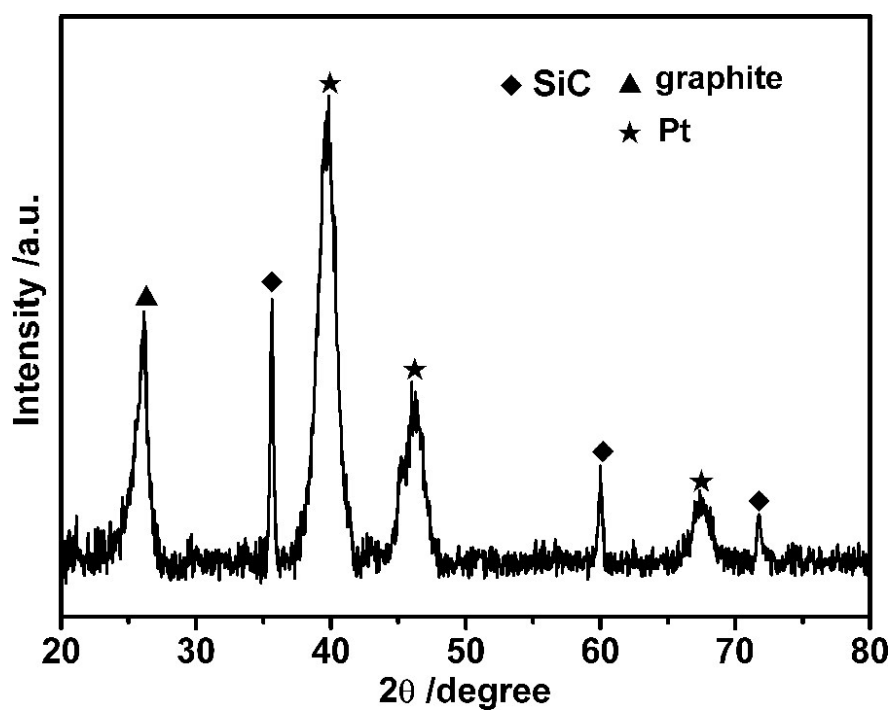

Fig. S12 XRD pattern of Pt-SiC/GC composite.

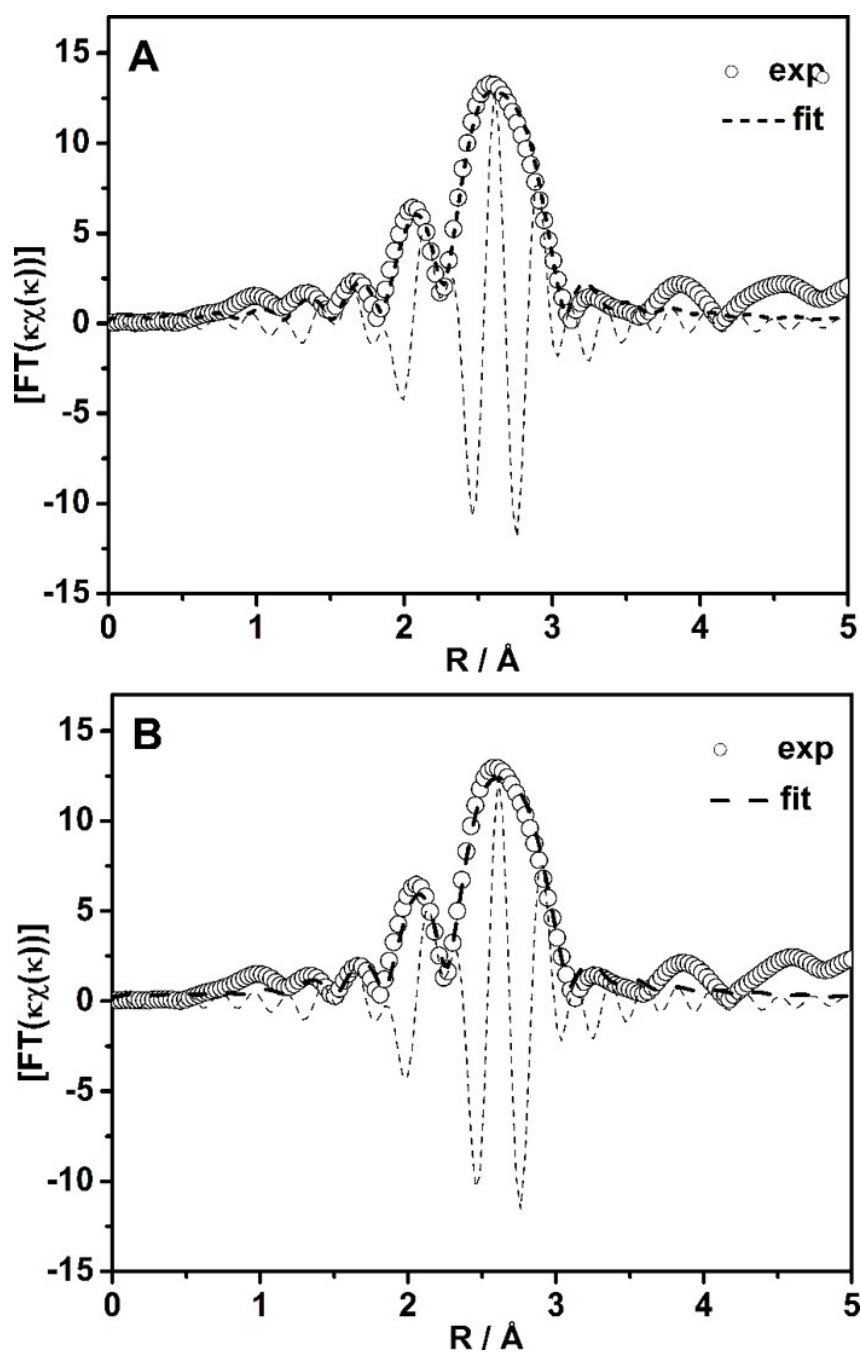

**Fig. S13** Fourier transforms of experimental data (o) and fit data (—) of Pt L3-edge extended X-ray absorption fine structure (EXAFS) spectra for Pt-SiC/GC and Pt/GC composites.

**Table S4.** Fitting parameters of EXAFS spectra for Pt foil, Pt /GC and Pt-SiC/GC in Figure 5B.

| Sample   | shell | N <sup>[a]</sup> | R <sup>[b]</sup> | $\sigma^2$ ( $10^{-3} \text{ \AA}^2$ ) <sup>[c]</sup> | $\Delta E_0$ (eV) <sup>[d]</sup> |
|----------|-------|------------------|------------------|-------------------------------------------------------|----------------------------------|
| Pt foil  | Pt-Pt | $9.84 \pm 0.8$   | $2.76 \pm 0.02$  | $4.5 \pm 0.2$                                         | $7.82 \pm 0.4$                   |
| Pt/GC    | Pt-C  | $1.15 \pm 0.2$   | $2.05 \pm 0.3$   | $2.1 \pm 0.4$                                         | $15.8 \pm 0.6$                   |
|          | Pt-Pt | $8.28 \pm 0.1$   | $2.82 \pm 0.06$  | $6.3 \pm 0.7$                                         | $9.72 \pm 1.4$                   |
| P-SiC/GC | Pt-C  | $2.04 \pm 0.5$   | $2.13 \pm 0.04$  | $2.6 \pm 3.0$                                         | $9.48 \pm 0.1$                   |
|          | Pt-Pt | $9.22 \pm 0.2$   | $2.75 \pm 0.06$  | $0.6 \pm 0.1$                                         | $8.12 \pm 0.9$                   |

[a] Coordination number. [b] Distance between absorber and backscatterer atoms. [c] Debye–Waller factor. [d] Inner potential correction. Error bounds (accuracies) characterizing the structural parameters obtained by EXAFS spectroscopy are estimated as follows: coordination number  $N \pm 20\%$ ; distance  $R \pm 0.02$ , Debye–Waller factor  $\sigma^2 \pm 10\%$ ; and inner potential correction  $\Delta E_0 \pm 20\%$ .

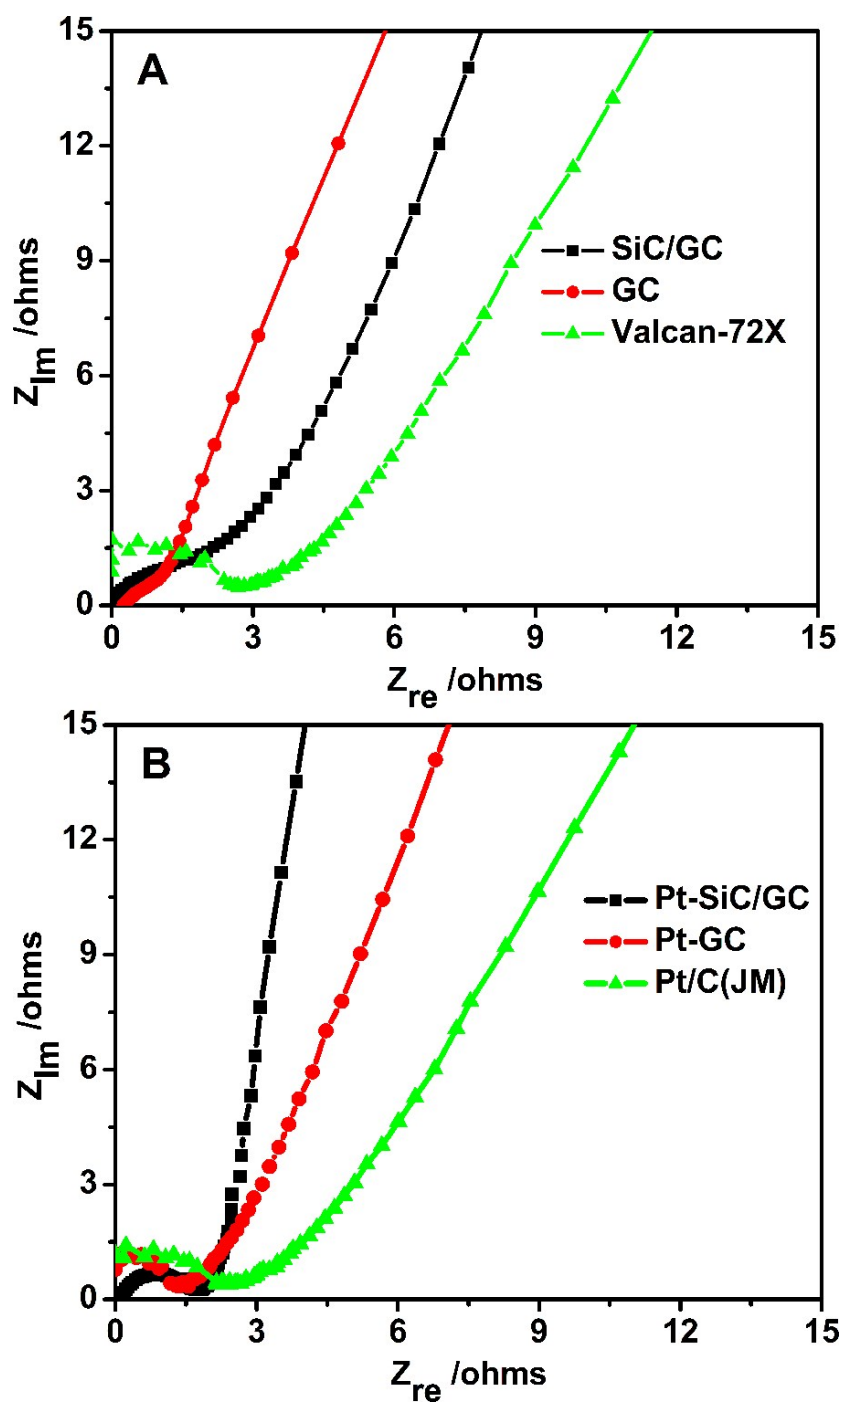

**Fig. S14** Electrochemical impedance spectra (EIS) of (A) SiC/GC, GC, Vulcan-72X supports, and (B) Pt-SiC/GC, Pt/GC, Pt/C catalysts tested in 0.5 M  $H_2SO_4$  + 0.5 M  $CH_3OH$  electrolyte.

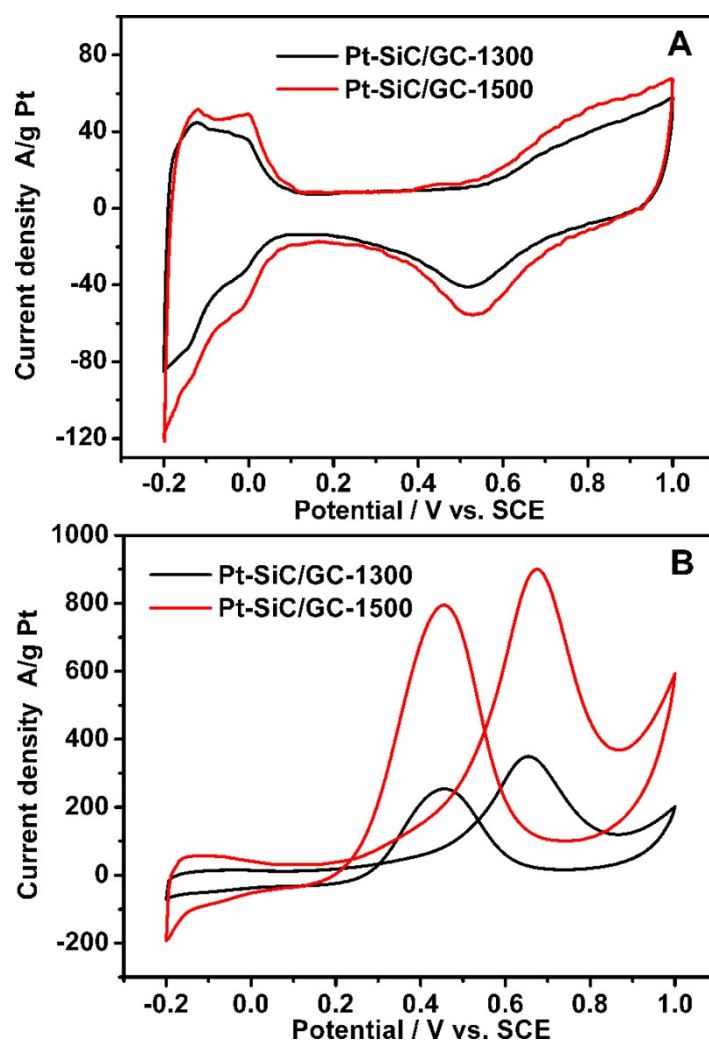

**Fig. S15** Electrochemical performances of Pt-SiC/GC-1300 and Pt-SiC/GC-1500 catalysts: The CV curves in 0.5 M H<sub>2</sub>SO<sub>4</sub> electrolyte (A) and 0.5 M H<sub>2</sub>SO<sub>4</sub> + 0.5 M CH<sub>3</sub>OH electrolyte (B), respectively.

**Table S5** The electrochemical performance of the catalysts.

| Catalysts      | ECSA<br>(A/g Pt) | Peak potential<br>(V) | Mass current<br>density (A/g Pt) | I <sub>f</sub> /I <sub>b</sub> |
|----------------|------------------|-----------------------|----------------------------------|--------------------------------|
| Pt-SiC/GC-1300 | 61.9             | 0.67                  | 353.8                            | 1.32                           |
| Pt-SiC/GC-1500 | 74.5             | 0.68                  | 902.3                            | 1.11                           |
| Pt-SiC/C       | 52.3             | 0.70                  | 217.1                            | 0.89                           |

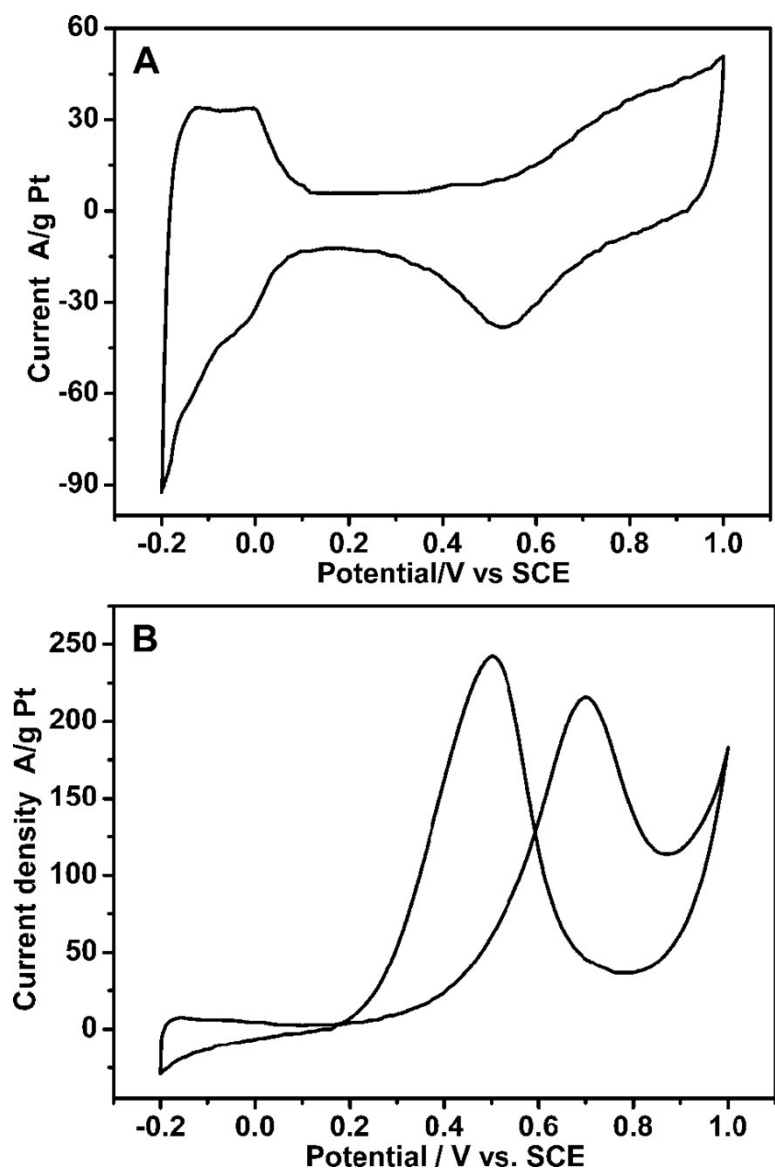

**Fig. S16** The CV curves of Pt-SiC/C catalyst in (A) 0.5 M H<sub>2</sub>SO<sub>4</sub> electrolyte and (B) 0.5 M H<sub>2</sub>SO<sub>4</sub> + 0.5 M CH<sub>3</sub>OH electrolyte, respectively.

**Table S6.** The performances of the previous reported carbide (nitride)-based Pt catalysts towards MOR.

| No.       | Material name                   | Pt content  | ECSA<br>(m <sup>2</sup> /g Pt) | Current density<br>(A/g Pt) | Ref.             |
|-----------|---------------------------------|-------------|--------------------------------|-----------------------------|------------------|
| 1         | Pt/SiC                          | 32.8 %      |                                | 42.25                       | S1               |
| 2         | Pt-Ti/SiC                       | 32.8 %      | 107.64                         | 327.84                      | S1               |
| 3         | Pt-SiC/porous carbon            | 20 %        | 62.5                           | 836.93                      | S2               |
| 4         | Pt/SiC                          |             | 87.9                           | 1008.3                      | S3               |
| 5         | Pt-WC/RGO                       | 5.7 %       | 253.12                         | 888.8                       | S4               |
| 6         | Pt-WC/mesoporous carbon         | 20 %        |                                | 784                         | S5               |
| 7         | Pt-WC/ordered mesoporous carbon | 20 %        |                                | 367.5                       | S6               |
| 8         | Pt-WC/GC                        | 7.5 %       |                                | 205.6                       | S7               |
| 9         | Pt-WC/GC                        | 20.5 %      | 207.4                          | 1590                        | S8               |
| 10        | Pt-WC/GC                        | 37.2 %      |                                | 1191.8                      | S9               |
| 11        | Pt-WC/graphene                  | 7.5 %       | 103.8                          | 686.6                       | S10              |
| 12        | Pt-MoC-GC                       | 36.6 %      | 55.1                           | 1596.7                      | S11              |
| 13        | Pt/NbC nanowires                |             | 72.86                          | 766.1                       | S12              |
| 14        | P-VC <sub>x</sub> /C            | 34.9 %      |                                | ~1270                       | S13              |
| 15        | Pt/CrN                          | 20 %        | 82                             | 195                         | S14              |
| 16        | Pt/TiC nanowires                | 19.7 %      |                                | 348.3                       | S15              |
| 17        | Pt-WN/graphene                  | 7.5 %       | 88.4                           | 531.5                       | S16              |
| <b>18</b> | <b>Pt-SiC/GC</b>                | <b>10 %</b> | <b>147.1</b>                   | <b>1585.3</b>               | <b>This work</b> |

**References in here:**

S1. Y. Zhang, J. Zang, L. Dong, X. Cheng, Y. Zhao, Y. Wang. *J. Mater. Chem. A*, **2014**, 2, 10146–10153.

S2. L. Jiang, H. Fu, L. Wang, W. Zhou, B. Jiang, R. Wang. *RSC Adv.*, **2014**, 4,

51272–51279.

- S3. L. Dong, X. Tong, Y. Wang, X. Guo, G. Jin, X. Guo. *J Solid State Electrochem*, **2014**, 18, 929–934.
- S4. C. Ma, W. Liu, M. Shi, X. Lang, Y. Chu, Z. Chen, D. Zhao, W. Lin, C. Hardacre. *Electrochimica Acta*, **2013**, 114, 133–141.
- S5. Y. Wang, C. He, A. Brouzgou, Y. Liang, R. Fu, D. Wu, P. Tsiakaras, S. Song. *J. Power Sources*, **2012**, 200, 8–13.
- S6. K. Wang, Y. Wang, Z. Liang, Y. Liang, D. Wu, S. Song, P. Tsiakaras. *Applied Catalysis B: Environmental*, **2014**, 147, 518–525.
- S7. Wang, R. H.; Tian, C. G.; Wang, L.; Wang, B. L.; Zhang, H. B.; Fu, H. G. *Chem. Commun.* **2009**, 3104–3106.
- S8. C. He, H. Meng, X. Yao, P. K. Shen. *International. J. Hydrogen Energy*, **2012**, 37, 8154–8160.
- S9. Z. Yan, H. Meng, P. K. Shen, R. Wang, L. Wang, K. Shi, H. Fu. *J. Mater. Chem.*, **2012**, 22, 5072–5079.
- S10. R. Wang, Y. Xie, K. Shi, J. Wang, C. Tian, P. Shen, H. Fu. *Chem. Eur. J.*, **2012**, 18, 7443–7451.
- S11. Z. Yan, G. He, P. K. Shen, Z. Luo, J. Xie, M. Chen. *J. Mater. Chem. A*, **2014**, 2, 4014–4022.
- S12. Z. Qiu, H. Huang, J. Du, T. Feng, W. Zhang, Y. Gan, X. Tao. *J. Phys. Chem. C*, **2013**, 117, 13770–13775.
- S13. Z. Yan, M. Cai, P. K. Shen. *J. Mater. Chem.*, **2011**, 21, 19166–19170.
- S14. M. Yang, R. Guarecuco, F. J. DiSalvo. *Chem. Mater.*, **2013**, 25, 1783–1787.
- S15. Z. Qiu, H. Huang, J. Du, X. Tao, Y. Xia, T. Feng, Y. Gan, W. Zhang. *J. Mater. Chem. A*, **2014**, 2, 8003–8008.
- S16. H. Yan, C. Tian, L. Sun, B. Wang, L. Wang, J. Yin, A. Wu, H. Fu. *Energy Environ. Sci.*, **2014**, 7, 1939–1949.
